# Supplementary material
Source: PubMed Central journal article supplement (PMC6440864)
Supplement: NIHMS1520643-supplement-Supp1.pdf [file NIHMS1520643-supplement-Supp1.pdf]

**Supplementary File 1: Summary of BoNT-A (Botulinum Toxin-A) Injection**

| <b>100 Unit (U) BoNT-A Injection Protocol</b> |                         |                          |                      |
|-----------------------------------------------|-------------------------|--------------------------|----------------------|
| Muscles Injected/Site                         | Units Injected Per Site | Number of Sites Per Side | Total Units Per Side |
| Procerus                                      | 5 U                     | 1 site                   | 5 U/side             |
| Bilateral (B/L) Corrugators                   | 2.5 U                   | 2 sites                  | 5 U/side             |
| B/L Frontalis                                 | 2.5 U                   | 5 sites                  | 12.5 U/side          |
| B/L Temporalis                                | 2.5 U                   | 4 sites                  | 10 U/side            |
| B/L Occipitalis                               | 2.5 U                   | 1 site                   | 2.5 U/side           |
| B/L Trapezius                                 | 10 U                    | 1 site                   | 10 U/side            |
| B/L Semispinalis capitis                      | 2.5 U                   | 3 sites                  | 7.5 U/side           |

**Protocols**

| <b>150 Unit (U) BoNT-A Injection Protocol</b> |                         |                          |                      |
|-----------------------------------------------|-------------------------|--------------------------|----------------------|
| Muscles Injected/Site                         | Units Injected Per Site | Number of Sites Per Side | Total Units Per Side |
| Procerus                                      | 5 U                     | 1 site                   | 5 U/side             |
| Bilateral (B/L) Corrugators                   | 2.5 U                   | 2 sites                  | 5 U/side             |
| B/L Frontalis                                 | 5 U                     | 2 sites                  | 10 U/side            |
| B/L Temporalis                                | 5 U                     | 4 sites                  | 20 U/side            |
| B/L Occipitalis                               | 5 U                     | 3 sites                  | 15 U/side            |
| B/L Trapezius                                 | 12.5 U                  | 1 site                   | 12.5 U/side          |
| B/L Semispinalis capitis                      | 5 U                     | 2 sites                  | 10 U/side            |
