# Supplementary material
Source: PubMed Central journal article supplement (PMC6440864)
Supplement: NIHMS1520643-supplement-Supp2.pdf [file NIHMS1520643-supplement-Supp2.pdf]

## Supplementary File 2: Baseline characteristics of study population

| <b>Demographics</b>                                            |             |
|----------------------------------------------------------------|-------------|
| Age, mean (SD)                                                 | 48.0 (10.1) |
| Gender, male, n (%)                                            | 43 (59.7%)  |
| Race, white, n (%)                                             | 46 (67.6%)  |
| Ethnicity, non-Hispanic, n (%)                                 | 45 (63.4%)  |
| Current smoking, n (%)                                         | 9 (12.5%)   |
| Ever smoker, n (%)                                             | 30 (41.7%)  |
| <b>Systemic co-morbidity, n (%)</b>                            |             |
| Hypertension                                                   | 23 (31.9%)  |
| Cardiovascular disease                                         | 7 (9.7%)    |
| Diabetes mellitus                                              | 10 (13.9%)  |
| Stroke                                                         | 3 (4.2%)    |
| Depression                                                     | 41 (56.9%)  |
| Anxiety                                                        | 19 (26.4%)  |
| Post-traumatic stress disorder                                 | 33 (45.8%)  |
| Fibromyalgia                                                   | 8 (11.1%)   |
| Traumatic brain injury                                         | 9 (12.5%)   |
| Sleep apnea                                                    | 28 (38.9%)  |
| Insomnia                                                       | 20 (27.8%)  |
| <b>Active medications, n (%)</b>                               |             |
| Anxiolytics                                                    | 12 (16.7%)  |
| Anti-depressants                                               | 49 (68.1%)  |
| Anti-psychotics                                                | 11 (15.3%)  |
| Topiramate                                                     | 14 (19.4%)  |
| Propranolol                                                    | 7 (9.7%)    |
| Prazosin                                                       | 15 (20.8%)  |
| Valproic Acid                                                  | 8 (11.1%)   |
| Triptans                                                       | 35 (48.6%)  |
| Magnesium                                                      | 27 (37.5%)  |
| Gabapentin                                                     | 23 (31.9%)  |
| NSAID                                                          | 33 (45.8%)  |
| Acetaminophen                                                  | 11 (15.3%)  |
| Opioids                                                        | 11 (15.3%)  |
| <b>Migraine history, mean (SD)</b>                             |             |
| Migraine severity over the last month, scale 0 to 10           | 7.4 (2.6)   |
| Migraine Symptom Severity Score (MSSS), scale 0 to 21          | 17.0 (3.9)  |
| Total years suffered from migraine                             | 16.8 (10.8) |
| <b>Botulinum toxin A (BoNT-A) injection history, mean (SD)</b> |             |
| Total number of BoTN-A treatments                              | 10.2 (7.6)  |
| Years elapsed since 1 <sup>st</sup> BoTN-A injection           | 2.7 (2.3)   |
| Months elapsed since last BoTN-A injection                     | 3.9 (4.4)   |
| <b>Photophobia severity, mean (SD)</b>                         |             |
| VLSQ-8, scale 8 to 40                                          | 29.9 (5.1)  |
| Photophobia severity during migraine, scale 0 to 10            | 8.01 (2.2)  |

|                                                            |            |
|------------------------------------------------------------|------------|
| Interictal photophobia severity, scale 0 to 10             | 4.99 (2.9) |
| <b>Ocular signs and symptoms</b>                           |            |
| DEQ-5 over the last month, mean (SD)                       | 12.9 (4.2) |
| Phenol red thread right eye (mm), mean (SD), scale 0 to 35 | 16.6 (7.1) |
| Phenol red thread left eye (mm), mean (SD), scale 0 to 35  | 17.0 (7.7) |
| Self-reported dry eye diagnosis, n (%)                     | 34 (47.9%) |
| Use of artificial tears, n (%)                             | 45 (62.5%) |
| Wears contact lenses, n (%)                                | 7 (9.7%)   |
| History of refractive surgery, n (%)                       | 10 (13.9%) |
| History of cataract surgery, n (%)                         | 3 (4.2%)   |

Total respondents varied dependent on data availability.

NSAIDs=non-steroidal anti-inflammatory drugs. DEQ-5=Dry Eye Questionnaire 5.

VLSQ-8=Visual Light Sensitivity Questionnaire-8. mm=millimeter. SD=Standard Deviation.
