# Supplementary material
Source: PubMed Central journal article supplement (PMC6440864)
Supplement: NIHMS1520643-supplement-Supp3.pdf [file NIHMS1520643-supplement-Supp3.pdf]

**Supplementary File 3: Univariable analysis of factors predicting likelihood to report symptom improvement**

| <b>Improvement in Photophobia<sup>†</sup></b>                                  |                   |                                |                |
|--------------------------------------------------------------------------------|-------------------|--------------------------------|----------------|
|                                                                                | <b>Odds Ratio</b> | <b>95% Confidence Interval</b> | <b>p-value</b> |
| Use of Artificial Tears                                                        | 0.18              | [0.05, 0.69]                   | 0.012          |
| <b>Improvement in Dry Eye Symptoms<sup>††</sup> (DEQ-5 <math>\geq</math>6)</b> |                   |                                |                |
| Pre-Injection DEQ-5                                                            | 1.27              | [1.06, 1.51]                   | 0.008          |

DEQ-5 = Dry Eye Questionnaire-5.

<sup>†</sup>Improvement in photophobia defined as  $\geq$ 2 categorical improvement in any one question of the VLSQ-8.

<sup>††</sup>Improvement in dry eye symptoms defined as  $\geq$ 3-point score decrease in DEQ-5.
